# Supplementary material for: Water-based polymer colloids with a branched chain architecture as low-gel pressure-sensitive adhesives
Source: Royal Society of Chemistry journal article supplement (doi:10.1039/d4py00522h), 2024-01-01
Supplement: d4py00522h1.pdf [file d4py00522h1.pdf]

# Electronic Supplementary Information

## Water-Based Polymer Colloids with a Branched Chain Architecture as Low-Gel Pressure-Sensitive Adhesives

Emily M. Brogden, Stefan A. F. Bon.\*

The University of Warwick, Coventry CV4 7AL, UK.

Web: <https://bonlab.info>, \*S.Bon@warwick.ac.uk

### List of Figures

|     |                                                                                                                                                                                                                                                                                                                                                                                                    |    |
|-----|----------------------------------------------------------------------------------------------------------------------------------------------------------------------------------------------------------------------------------------------------------------------------------------------------------------------------------------------------------------------------------------------------|----|
| S1  | Kinetics and particle size evolution for B_Xn_C4 where n= 4 ●, 7 ▲ and 16 ▼. . . . .                                                                                                                                                                                                                                                                                                               | 4  |
| S2  | Kinetics and particle size evolution for F_Xn_C4 where n= 0 ●, 8 ▲, 11 ▼, 13 × and 18 ■. . . . .                                                                                                                                                                                                                                                                                                   | 5  |
| S3  | Kinetics and particle size evolution for F_Xn_C2 where n= 0 ●, 8 ▲, 11 ▼, 13 × and 18 ■. . . . .                                                                                                                                                                                                                                                                                                   | 6  |
| S4  | Kinetics and particle size evolution for F_X13_Cn where n= 0.5 ●, 1 ▲, 2 ▼, and 4 ×. . . . .                                                                                                                                                                                                                                                                                                       | 7  |
| S5  | DSC thermograms for B_Xn_C4. . . . .                                                                                                                                                                                                                                                                                                                                                               | 8  |
| S6  | DSC thermograms for F_Xn_C4. . . . .                                                                                                                                                                                                                                                                                                                                                               | 9  |
| S7  | DSC thermograms for F_Xn_C2. . . . .                                                                                                                                                                                                                                                                                                                                                               | 10 |
| S8  | DSC thermograms for F_X13_Cn. . . . .                                                                                                                                                                                                                                                                                                                                                              | 10 |
| S9  | The molecular weight distributions from conventional SEC analysis for B_Xn_C4 from 10 min ■ to the final sample at 330 min ■. . . . .                                                                                                                                                                                                                                                              | 12 |
| S10 | The molecular weight distributions from conventional SEC analysis for F_Xn_C4 from 10 min ■ to the final sample at 330 min ■. . . . .                                                                                                                                                                                                                                                              | 13 |
| S11 | The molecular weight distributions from conventional SEC analysis for F_Xn_C2 from 10 min ■ to the final sample at 330 min ■. . . . .                                                                                                                                                                                                                                                              | 14 |
| S12 | The molecular weight distributions from conventional SEC analysis for F_X13_Cn from 10 min ■ to the final sample at 330 min ■. . . . .                                                                                                                                                                                                                                                             | 15 |
| S13 | The contact angles of water droplets on the PET substrate after chemical modification for various times at 30 (●) and 60 (▲) °C. The contact angle with no modification is shown at 0 h. . . . .                                                                                                                                                                                                   | 15 |
| S14 | Cylindrical roller bar attachment on an Elcometer 4340 Automatic Film Applicator, which enabled a second sheet of PET to be adhered to the cast films with minimal bubbles. The green arrows show the direction of movement. . . . .                                                                                                                                                               | 16 |
| S15 | A Shimadzu EZ-LX universal testing machine with a 500 N tensile jig in the upper position and a peel rolling jig in the lower position which can hold a custom-made metal holder used for peel adhesion tests. The green arrows show the direction of movement. . . . .                                                                                                                            | 16 |
| S16 | Peel adhesion force, $F_{peel}$ as a function of peel distance, stroke for F_Xn_C4 where n = 0 ■, 8 ■, 11 ■, 13 ■ and 18 ■. . . . .                                                                                                                                                                                                                                                                | 17 |
| S17 | Peel adhesion force, $F_{peel}$ as a function of peel distance, stroke for F_Xn_C2 where n = 0 ■, 8 ■, 11 ■, 13 ■ and 18 ■. . . . .                                                                                                                                                                                                                                                                | 17 |
| S18 | Peel adhesion force, $F_{peel}$ as a function of peel distance, stroke for F_X13_Cn where n= 0.5 ■, 1 ■, 2 ■ and 4 ■. . . . .                                                                                                                                                                                                                                                                      | 18 |
| S19 | A Shimadzu EZ-LX universal testing machine with 500 N tensile jigs in the upper and lower positions, which held strips of tape connected by a lap joint for shear strength tests. Diagrams are shown within the images to demonstrate the lap joint where the PET is represented the grey outlined shapes and the adhesive is light blue. The green arrows show the direction of movement. . . . . | 18 |
| S20 | Stress-strain curves to obtain shear strength, $W_{shear}$ , as the area under the curves for F_Xn_C4 where n = 0 ■, 8 ■, 11 ■, 13 ■ and 18 ■. . . . .                                                                                                                                                                                                                                             | 19 |
| S21 | Stress-strain curves to obtain shear strength, $W_{shear}$ , as the area under the curves for F_Xn_C2 where n = 0 ■, 8 ■, 11 ■, 13 ■ and 18 ■. . . . .                                                                                                                                                                                                                                             | 19 |
| S22 | Stress-strain curves to obtain shear strength, $W_{shear}$ , as the area under the curves for F_X13_Cn where n= 0.5 ■, 1 ■, 2 ■ and 4 ■. . . . .                                                                                                                                                                                                                                                   | 19 |
| S23 | Stress-strain curves to obtain tack adhesion energy, $W_{adh}$ , as the area under the curves for B_Xn_C4 where n = 4 ■, 7 ■, 16 ■. . . . .                                                                                                                                                                                                                                                        | 20 |
| S24 | Stress-strain curves to obtain tack adhesion energy, $W_{adh}$ , as the area under the curves for F_Xn_C4 where n = 0 ■, 8 ■, 11 ■, 13 ■ and 18 ■. . . . .                                                                                                                                                                                                                                         | 21 |

|     |                                                                                                                                                                                                                                                                     |    |
|-----|---------------------------------------------------------------------------------------------------------------------------------------------------------------------------------------------------------------------------------------------------------------------|----|
| S25 | Stress-strain curves to obtain tack adhesion energy, $W_{adh}$ , as the area under the curves for F_Xn_C2 where n = 0 ■, 8 ■, 11 ■, 13 ■ and 18 ■. . . . .                                                                                                          | 21 |
| S26 | Stress-strain curves to obtain tack adhesion energy, $W_{adh}$ , as the area under the curves for F_X13_Cn where n = 0.5 ■, 1 ■, 2 ■ and 4 ■. . . . .                                                                                                               | 21 |
| S27 | Amplitude sweeps with the storage modulus, $G'$ ■, and loss modulus, $G''$ ■, for F_Xn_C4 where n = 0 ●, 8 ▲, 11 ▼, 13 × and 18 ■. The verticle black line shows the displacement used in the frequency sweeps to remain in the linear viscoelastic regime. . . . . | 22 |
| S28 | Amplitude sweeps with the storage modulus, $G'$ ■, and loss modulus, $G''$ ■, for F_Xn_C2 where n = 0 ●, 8 ▲, 11 ▼, 13 × and 18 ■. The verticle black line shows the displacement used in the frequency sweeps to remain in the linear viscoelastic regime. . . . . | 22 |
| S29 | Amplitude sweeps with the storage modulus, $G'$ ■, and loss modulus, $G''$ ■, for F_X13_Cn where n = 0.5 ●, 1 ▲, 2 ▼, and 4 ×. The verticle black line shows the displacement used in the frequency sweeps to remain in the linear viscoelastic regime. . . . .     | 22 |
| S30 | Rheological frequency sweeps of F_Xn_C4 where n = 0 ●, 8 ▲, 11 ▼, 13 × and 18 ■. . . . .                                                                                                                                                                            | 23 |
| S31 | Rheological frequency sweeps of F_Xn_C2 where n = 0 ●, 8 ▲, 11 ▼, 13 × and 18 ■. . . . .                                                                                                                                                                            | 24 |
| S32 | Rheological frequency sweeps of F_X13_Cn where n = 0.5 ●, 1 ▲, 2 ▼, and 4 ×. . . . .                                                                                                                                                                                | 25 |
| S33 | The final molecular weight distributions from conventional SEC analysis for F_Xn_C4, where n = 0 ■, 8 ■, 11 ■, 13 ■ and 18 ■ where the surfactant molecular weight distributions for Brij L23 (- -) and Lakeland PAE 136 (- - -) are also shown. . . . .            | 26 |

## List of Tables

|    |                                                                                                                                                            |    |
|----|------------------------------------------------------------------------------------------------------------------------------------------------------------|----|
| S1 | Monomer compositions for each latex synthesized. The mole percentage quoted relates to the number of molecules and not the number of vinyl groups. . . . . | 2  |
| S2 | Recipes for each latex synthesized. . . . .                                                                                                                | 3  |
| S3 | Glass transition temperature, $T_g$ , analyses for all latexes synthesized. . . . .                                                                        | 11 |
| S4 | Average film heights during tack testing (average of 5 repeats) and rheological amplitude and frequency sweeps (average during the measurement). . . . .   | 20 |

Table S1: Monomer compositions for each latex synthesized. The mole percentage quoted relates to the number of molecules and not the number of vinyl groups.

| Sample     | 2-OA/<br>mol% | IBoMA/<br>mol% | AA/<br>mol% | EGDMA/<br>mol% | 2-EHTG/<br>mol% |
|------------|---------------|----------------|-------------|----------------|-----------------|
| B_X04_C4   | 83.38         | 3.73           | 5.46        | 3.72           | 3.71            |
| B_X07_C4   | 80.34         | 3.57           | 5.34        | 7.18           | 3.57            |
| B_X16_C4   | 72.53         | 3.22           | 4.89        | 16.13          | 3.23            |
| F_X00_C4   | 86.15         | 3.84           | 5.73        | 0              | 4.27            |
| F_X08_C4   | 81.52         | 4.39           | 2.11        | 7.93           | 4.04            |
| F_X11_C4   | 78.90         | 4.23           | 2.06        | 10.92          | 3.88            |
| F_X13_C4   | 77.12         | 4.14           | 2.03        | 12.92          | 3.80            |
| F_X18_C4   | 73.02         | 3.95           | 1.91        | 17.50          | 3.62            |
| F_X00_C2   | 88.03         | 3.93           | 5.86        | 0              | 2.18            |
| F_X08_C2   | 83.20         | 4.49           | 2.17        | 8.07           | 2.07            |
| F_X11_C2   | 80.45         | 4.33           | 2.09        | 11.14          | 1.98            |
| F_X13_C2   | 78.86         | 4.15           | 2.03        | 13.05          | 1.91            |
| F_X18_C2   | 74.36         | 3.99           | 1.94        | 17.86          | 1.86            |
| F_X13_C1   | 78.39         | 4.20           | 2.05        | 14.25          | 1.11            |
| F_X13_C0.5 | 78.97         | 4.24           | 2.07        | 14.16          | 0.57            |

Table S2: Recipes for each latex synthesized.

| Latex      | Charge     |             |          |             |              |           |                        |                           |            |             | Feed 1   |             |              |                   |                           | Feed 2                   |                        |  |  |
|------------|------------|-------------|----------|-------------|--------------|-----------|------------------------|---------------------------|------------|-------------|----------|-------------|--------------|-------------------|---------------------------|--------------------------|------------------------|--|--|
|            | 2-OA<br>/g | IBoMA<br>/g | AA<br>/g | EGDMA<br>/g | 2-EHTG<br>/g | APS<br>/g | H <sub>2</sub> O<br>/g | Lakeland<br>PAE 136<br>/g | 2-OA<br>/g | IBoMA<br>/g | AA<br>/g | EGDMA<br>/g | 2-EHTG<br>/g | Brij<br>L23<br>/g | Lakeland<br>PAE 136<br>/g | NaHCO <sub>3</sub><br>/g | H <sub>2</sub> O<br>/g |  |  |
| B_X04_C4   | 6.0697     | 0.3274      | 0.1555   | 0.2913      | 0.2996       | 0.1969    | 121.6246               | 0.3478                    | 59.9031    | 3.1875      | 1.5136   | 2.8358      | 2.9169       | 2.0433            | 0.2443                    | 0.5630                   | 9.7165                 |  |  |
| B_X07_C4   | 5.8665     | 0.3144      | 0.1525   | 0.5637      | 0.2889       | 0.1965    | 121.8350               | 0.3515                    | 57.7494    | 3.0953      | 1.5011   | 5.5487      | 2.8437       | 2.0258            | 0.2447                    | 0.5575                   | 9.6254                 |  |  |
| B_X16_C4   | 5.3319     | 0.2860      | 0.1406   | 1.2756      | 0.2632       | 0.1965    | 121.6950               | 0.3492                    | 52.0877    | 2.7936      | 1.3735   | 12.4615     | 2.5716       | 2.0357            | 0.2459                    | 0.5602                   | 9.6721                 |  |  |
| F_X00_C4   | 6.2578     | 0.3365      | 0.1628   | 0           | 0.3443       | 0.1966    | 121.6449               | 0.3459                    | 61.1951    | 3.2910      | 1.5922   | 0           | 3.3669       | 2.0453            | 0.2445                    | 0.5631                   | 9.7326                 |  |  |
| F_X08_C4   | 6.2854     | 0.3385      | 0.1627   | 0           | 0.3118       | 0.1969    | 121.6546               | 0.3466                    | 54.3508    | 2.9313      | 1.5662   | 5.8843      | 3.0002       | 1.9968            | 0.2393                    | 0.5508                   | 9.5297                 |  |  |
| F_X11_C4   | 6.2872     | 0.3374      | 0.1645   | 0           | 0.3092       | 0.1966    | 121.6249               | 0.3481                    | 53.7040    | 2.8876      | 1.5711   | 8.3122      | 2.9528       | 2.0430            | 0.2447                    | 0.5630                   | 9.7089                 |  |  |
| F_X13_C4   | 6.2861     | 0.3373      | 0.1653   | 0           | 0.3098       | 0.1966    | 121.6449               | 0.3485                    | 52.2114    | 2.8082      | 1.5393   | 9.8058      | 2.8855       | 2.0407            | 0.2444                    | 0.5624                   | 9.6981                 |  |  |
| F_X18_C4   | 6.2831     | 0.3395      | 0.1647   | 0           | 0.3115       | 0.1969    | 121.9146               | 0.3478                    | 49.2538    | 2.6706      | 1.4592   | 13.3408     | 2.7593       | 2.0277            | 0.2430                    | 0.5593                   | 9.6774                 |  |  |
| F_X00_C2   | 6.3993     | 0.3448      | 0.1667   | 0           | 0.1966       | 121.8449  | 0.3471                 | 0.3471                    | 61.7542    | 3.3271      | 1.6085   | 0           | 1.6931       | 2.0581            | 0.2460                    | 0.5666                   | 9.7938                 |  |  |
| F_X08_C2   | 6.4124     | 0.3458      | 0.1669   | 0           | 0.1597       | 0.1930    | 121.8385               | 0.3463                    | 56.5808    | 3.0557      | 1.6428   | 6.1248      | 1.5718       | 2.0392            | 0.2470                    | 0.5613                   | 9.6983                 |  |  |
| F_X11_C2   | 6.4146     | 0.3448      | 0.1669   | 0           | 0.1582       | 0.1962    | 121.7453               | 0.3512                    | 54.8600    | 2.9553      | 1.5964   | 8.4964      | 1.5125       | 2.0374            | 0.2447                    | 0.5622                   | 9.6901                 |  |  |
| F_X13_C2   | 6.4241     | 0.3382      | 0.1650   | 0           | 0.1560       | 0.1962    | 121.6953               | 0.3468                    | 53.3074    | 2.8135      | 1.5330   | 9.8773      | 1.4492       | 2.0037            | 0.2406                    | 0.5529                   | 9.5300                 |  |  |
| F_X18_C2   | 6.4131     | 0.3439      | 0.1675   | 0           | 0.1602       | 0.1930    | 121.5685               | 0.3488                    | 49.3668    | 2.6573      | 1.4613   | 13.4350     | 1.3972       | 1.9966            | 0.2419                    | 0.5496                   | 9.4958                 |  |  |
| F_X13_C1   | 6.4709     | 0.3464      | 0.1692   | 0           | 0.0920       | 0.1965    | 121.6750               | 0.3490                    | 52.9906    | 2.8448      | 1.5566   | 10.8235     | 0.8460       | 2.0415            | 0.2442                    | 0.5620                   | 9.7056                 |  |  |
| F_X13_C0.5 | 6.5081     | 0.3491      | 0.1704   | 0           | 0.0470       | 0.1965    | 121.6850               | 0.3483                    | 53.4100    | 2.8726      | 1.5708   | 10.7551     | 0.4334       | 2.0097            | 0.2404                    | 0.5533                   | 9.5544                 |  |  |

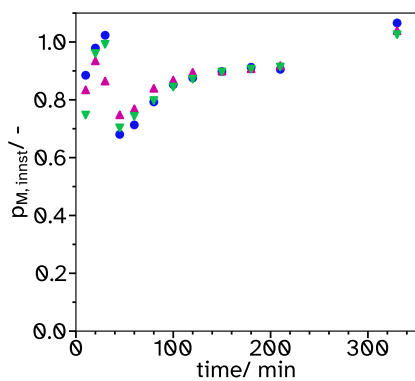

(a) Instantaneous monomer conversion,  $\rho_{M,inst}$ , over time.

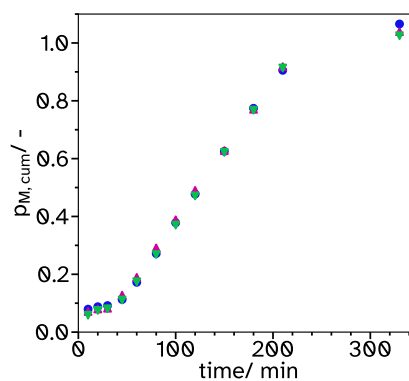

(b) Cumulative monomer conversion,  $\rho_{M,cum}$ , over time.

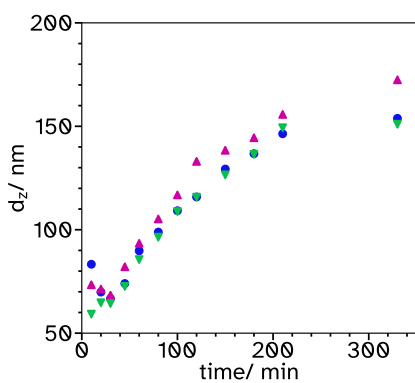

(c) Average hydrodynamic diameter,  $d_z$ , over time.

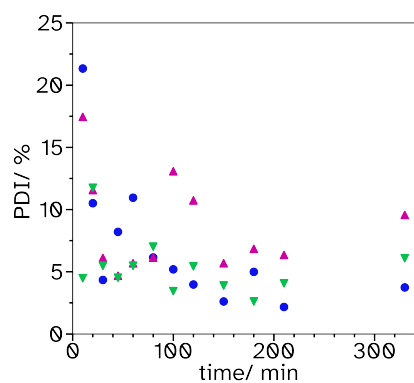

(d) Average particle dispersity index,  $PDI$ , over time.

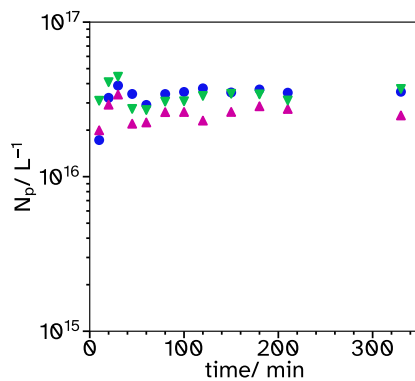

(e) Average number of particles,  $N_p$ , over time.

Figure S1: Kinetics and particle size evolution for B\_Xn\_C4 where n= 4 ●, 7 ▲ and 16 ▼.

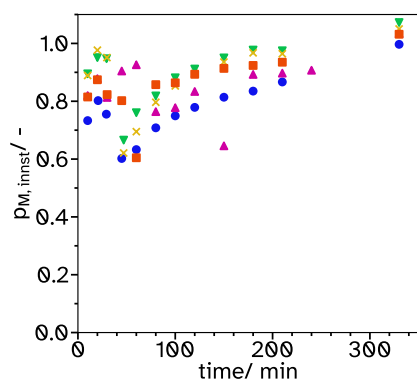

(a) Instantaneous monomer conversion,  $\rho_{M,inst}$ , over time.

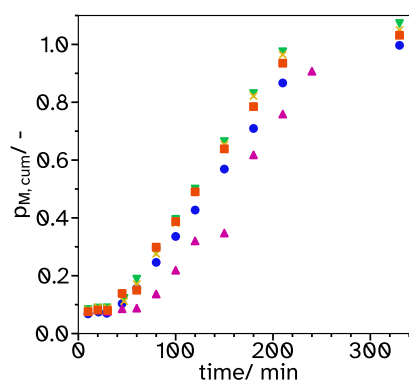

(b) Cumulative monomer conversion,  $\rho_{M,cum}$ , over time.

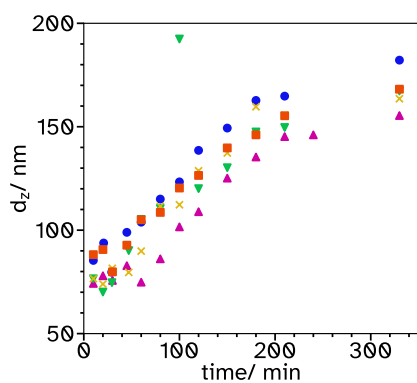

(c) Average hydrodynamic diameter,  $d_z$ , over time.

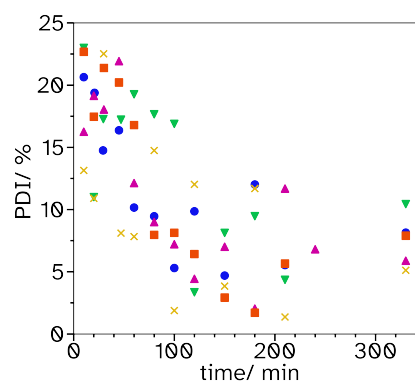

(d) Average particle dispersity index,  $PDI$ , over time.

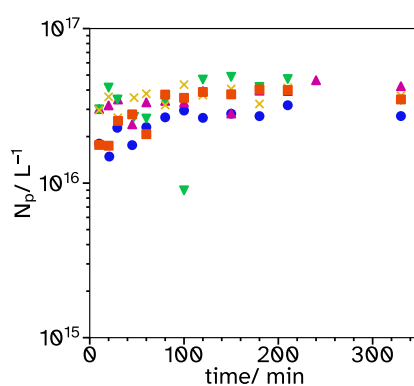

(e) Average number of particles,  $N_p$ , over time.

Figure S2: Kinetics and particle size evolution for F\_Xn\_C4 where n=0 ●, 8 ▲, 11 ▼, 13 × and 18 ■.

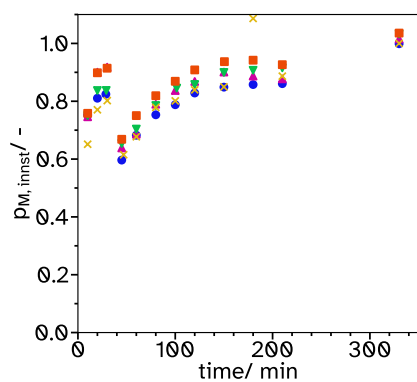

(a) Instantaneous monomer conversion,  $\rho_{M,inst}$ , over time.

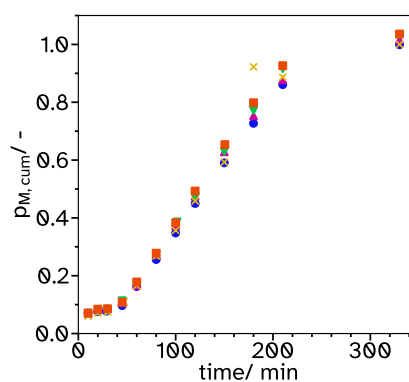

(b) Cumulative monomer conversion,  $\rho_{M,cum}$ , over time.

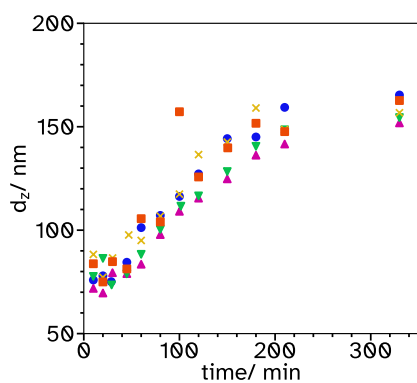

(c) Average hydrodynamic diameter,  $d_z$ , over time.

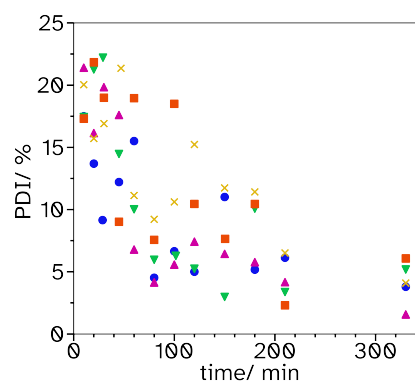

(d) Average particle dispersity index,  $PDI$ , over time.

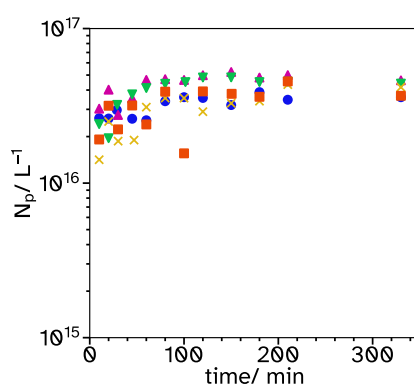

(e) Average number of particles,  $N_p$ , over time.

Figure S3: Kinetics and particle size evolution for F\_Xn\_C2 where n=0 ●, 8 ▲, 11 ▼, 13 × and 18 ■.

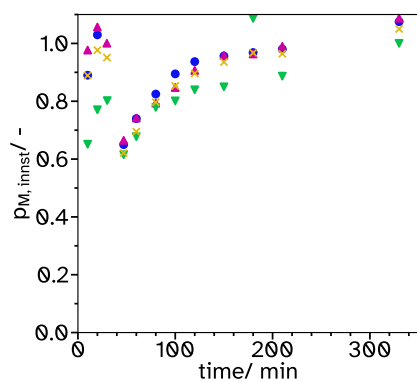

(a) Instantaneous monomer conversion,  $\rho_{M,inst}$ , over time.

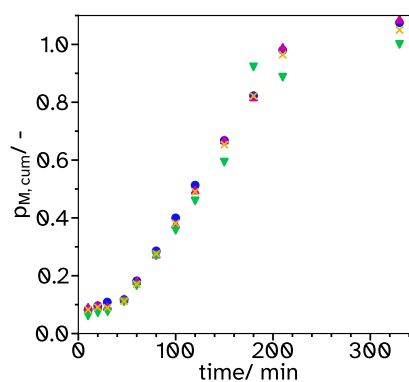

(b) Cumulative monomer conversion,  $\rho_{M,cum}$ , over time.

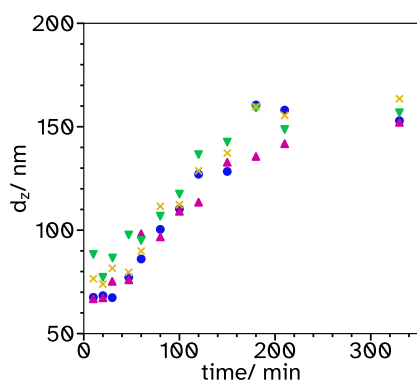

(c) Average hydrodynamic diameter,  $d_z$ , over time.

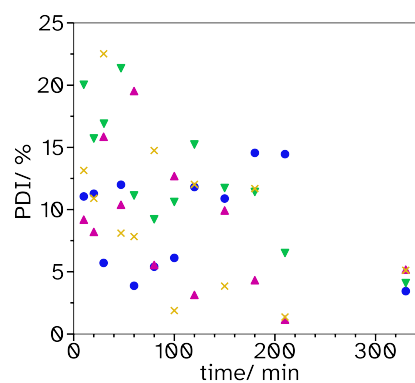

(d) Average particle dispersity index,  $PDI$ , over time.

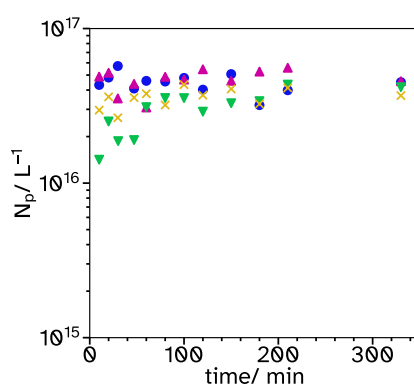

(e) Average number of particles,  $N_p$ , over time.

Figure S4: Kinetics and particle size evolution for F\_X13\_Cn where  $n=0.5$  ●, 1 ▲, 2 ▼, and 4 ×.

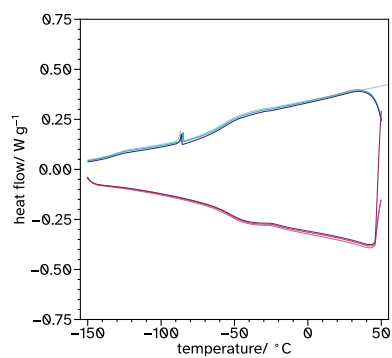

(a) n= 4

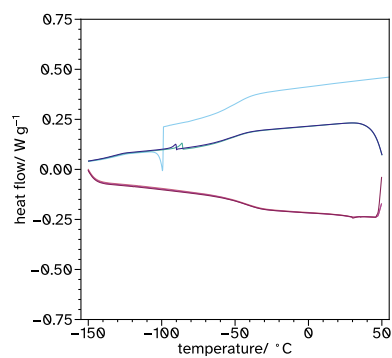

(b) n= 7

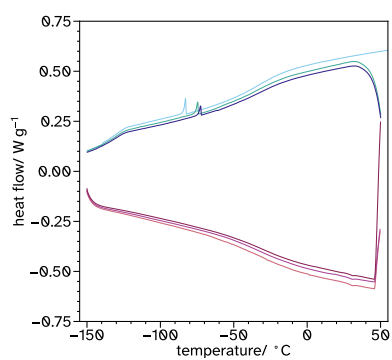

(c) n= 16

Figure S5: DSC thermograms for B\_Xn\_C4.



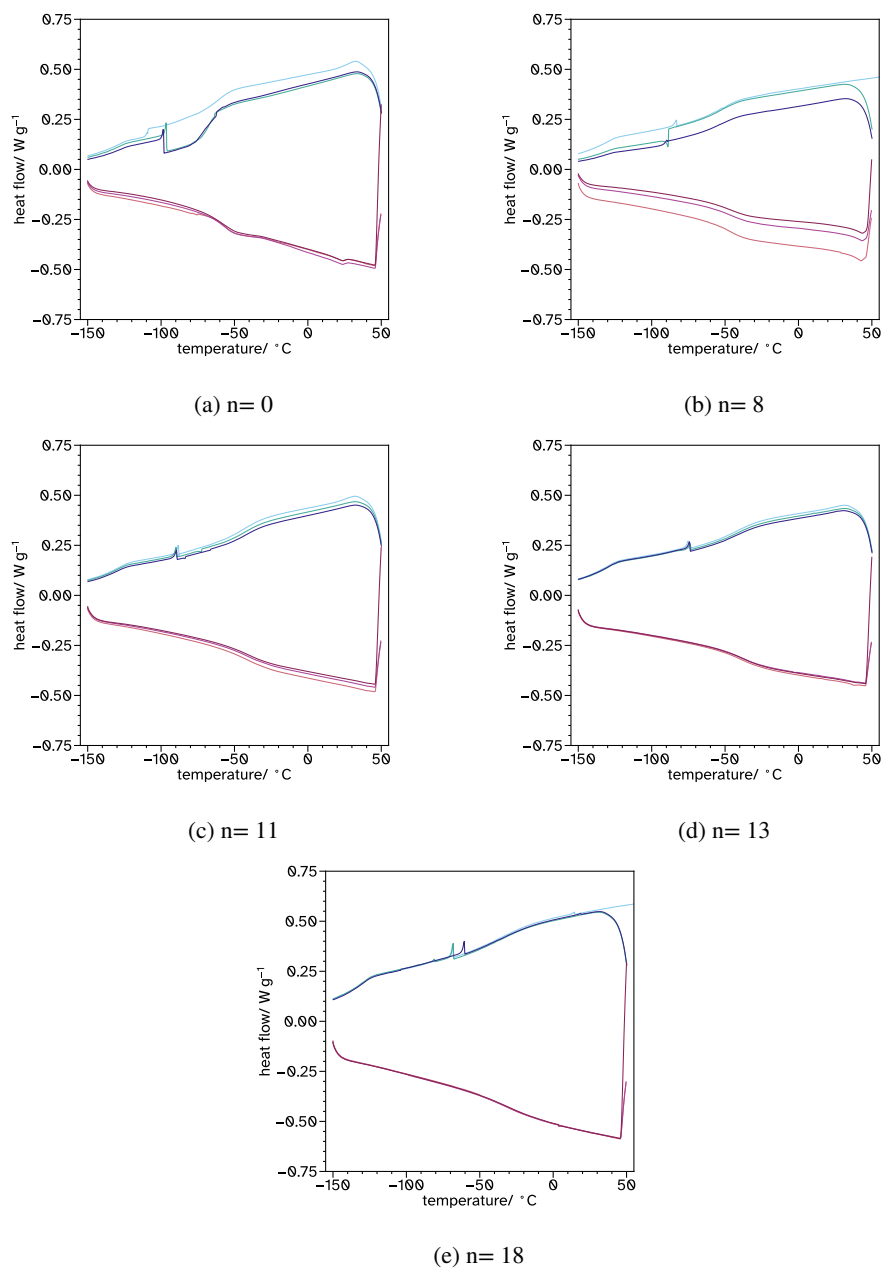

Figure S6: DSC thermograms for F\_Xn\_C4.

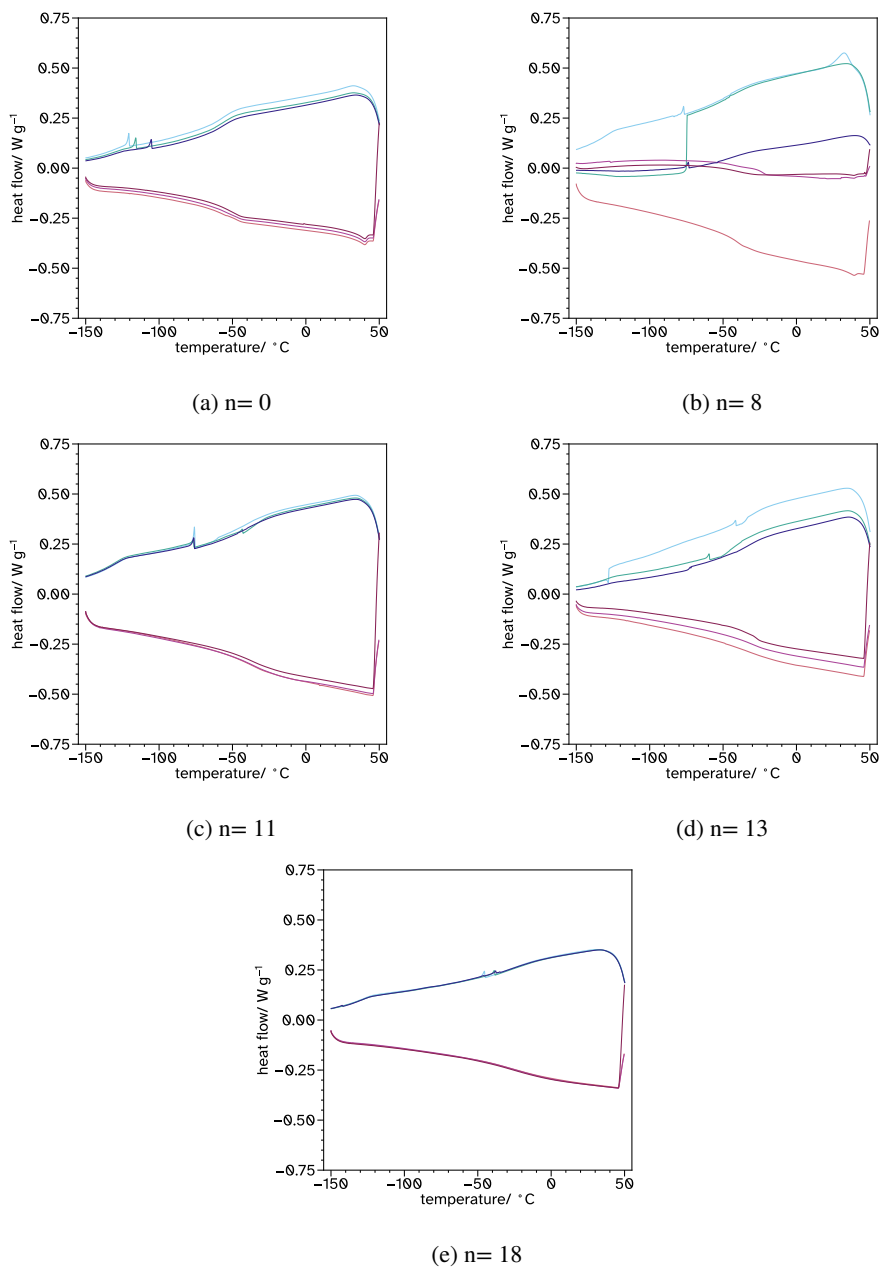

Figure S7: DSC thermograms for F\_Xn\_C2.

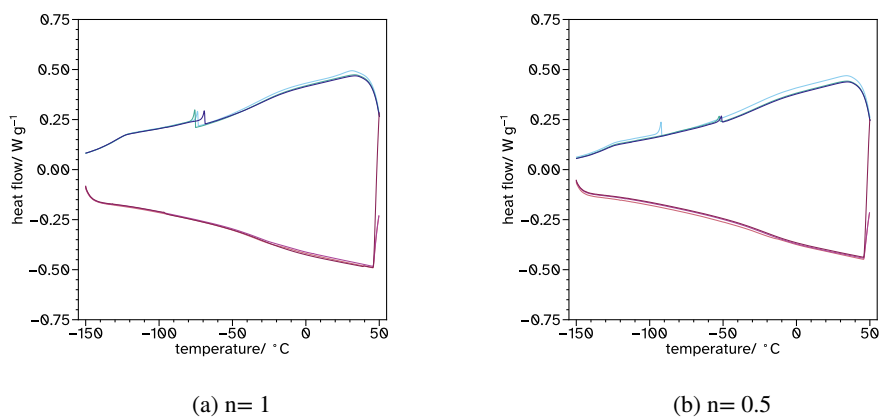

Figure S8: DSC thermograms for F\_X13\_Cn.

Table S3: Glass transition temperature,  $T_g$ , analyses for all latexes synthesized.

| Latex      | Cooling Midpoint/ °C |        |        | Cooling Onset/ °C |        |        | Heating Midpoint/ °C |        |               | Heating Onset/ °C |        |        |
|------------|----------------------|--------|--------|-------------------|--------|--------|----------------------|--------|---------------|-------------------|--------|--------|
|            | 1                    | 2      | 3      | 1                 | 2      | 3      | 1                    | 2      | 3             | 1                 | 2      | 3      |
| B_X04_C4   | -61.28               | -59.13 | -60.28 | -49.48            | -48.23 | -49.69 | -56.84               | -58.26 | <b>-58.45</b> | -64.11            | -64.37 | -66.38 |
| B_X07_C4   | -49.07               | -56.29 | -51.41 | -38.65            | -38.75 | -39.78 | -41.30               | -44.01 | <b>-42.74</b> | -56.26            | -61.30 | -58.46 |
| B_X16_C4   | -35.97               | -37.09 | -38.36 | -9.89             | -16.24 | -13.58 | -28.38               | -33.27 | <b>-30.72</b> | -58.30            | -53.65 | -49.29 |
| F_X00_C4   | -61.91               | -68.44 | -67.18 | -52.15            | -62.60 | -60.40 | -55.72               | -56.85 | <b>-56.72</b> | -62.49            | -66.23 | -69.37 |
| F_X08_C4   | -59.70               | -42.99 | -59.57 | -40.11            | -40.10 | -40.29 | -44.88               | -44.88 | <b>-46.02</b> | -57.25            | -58.46 | -57.28 |
| F_X11_C4   | -46.61               | -46.85 | -44.91 | -26.29            | -24.34 | -27.45 | -40.75               | -42.28 | <b>-42.53</b> | -57.18            | -58.75 | -55.36 |
| F_X13_C4   | -42.76               | -43.30 | -42.46 | -22.71            | -20.55 | -21.88 | -44.77               | -37.67 | <b>-37.88</b> | -61.44            | -52.61 | -53.09 |
| F_X18_C4   | -36.62               | -39.97 | -41.59 | -14.32            | -16.61 | -14.55 | -34.29               | -28.64 | <b>-33.05</b> | -52.59            | -45.66 | 50.34  |
| F_X00_C2   | -60.10               | -59.57 | -60.40 | -46.04            | -44.77 | -47.84 | -55.68               | -53.93 | <b>-54.67</b> | -62.99            | -62.52 | -64.20 |
| F_X08_C2   | -49.38               | -      | -47.98 | -29.25            | -      | -29.63 | -40.99               | -32.30 | <b>-42.81</b> | -49.90            | -55.46 | -54.42 |
| F_X11_C2   | -41.90               | -31.93 | -39.46 | -27.18            | -23.99 | -31.82 | -36.44               | -34.75 | <b>-38.67</b> | -52.69            | -52.91 | -54.72 |
| F_X13_C2   | -31.59               | -39.49 | -35.90 | -27.33            | -28.45 | -24.91 | -35.22               | -30.14 | <b>-29.41</b> | -53.37            | -44.42 | -35.41 |
| F_X18_C2   | -29.46               | -24.67 | -18.67 | -6.96             | -7.28  | -1.47  | -25.44               | -25.89 | <b>-26.80</b> | -46.61            | -49.12 | -48.60 |
| F_X13_C1   | -38.11               | -36.28 | -36.46 | -13.46            | -11.62 | -14.44 | -37.37               | -37.47 | <b>-31.73</b> | -53.68            | -56.60 | -52.38 |
| F_X13_C0.5 | -41.90               | -26.43 | -26.47 | -6.72             | -3.99  | -6.80  | -30.03               | -22.63 | <b>-25.14</b> | -48.45            | -43.39 | -45.67 |

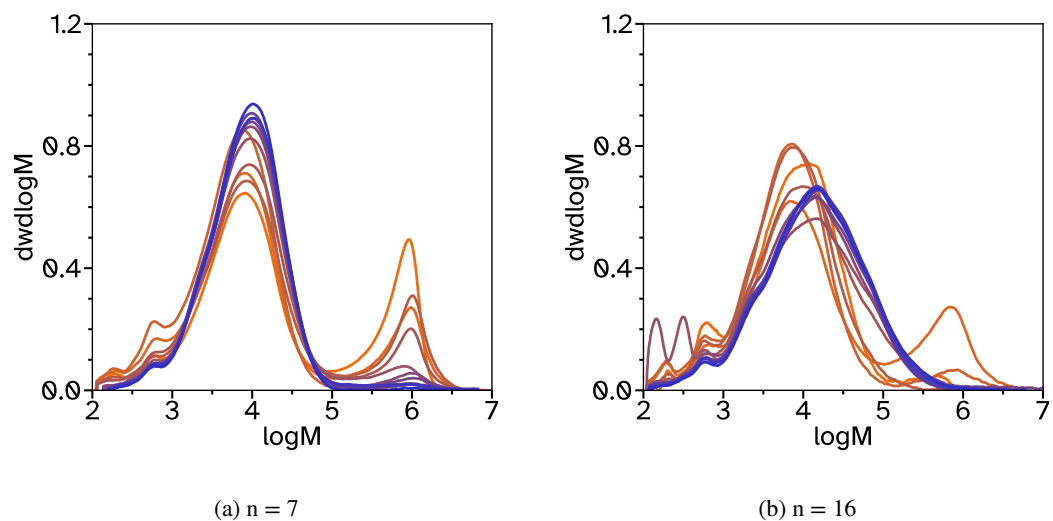

Figure S9: The molecular weight distributions from conventional SEC analysis for B\_Xn\_C4 from 10 min ■ to the final sample at 330 min ■.

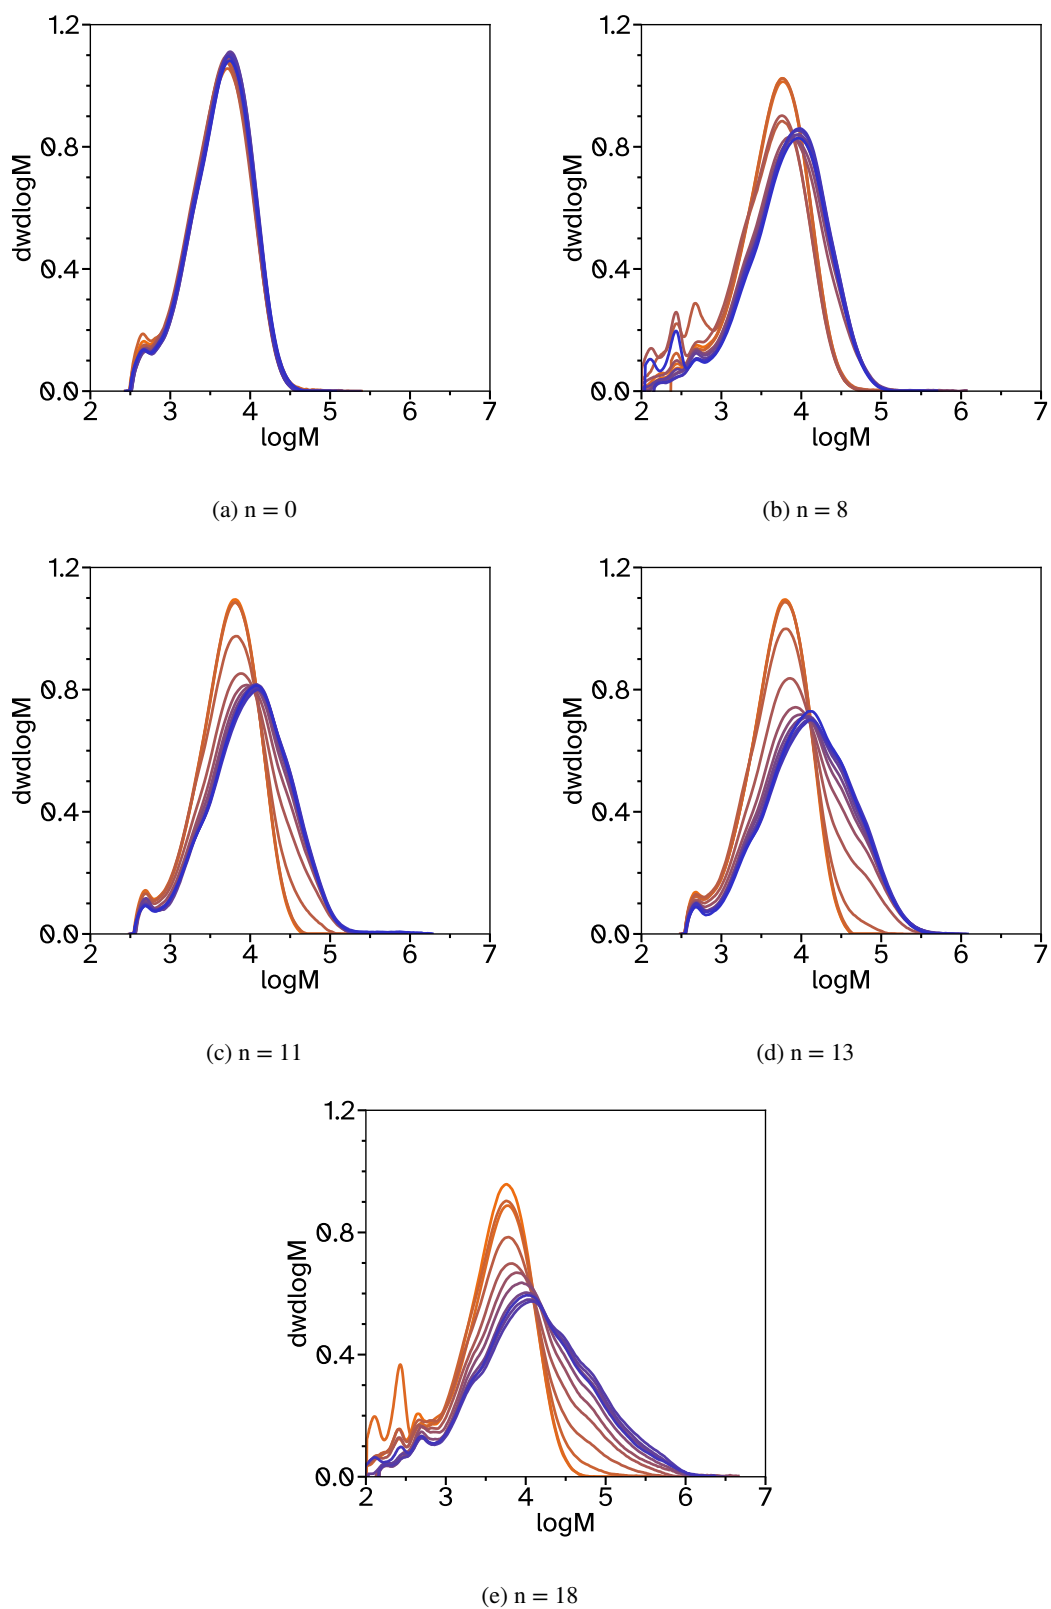

Figure S10: The molecular weight distributions from conventional SEC analysis for F\_Xn\_C4 from 10 min ■ to the final sample at 330 min ■.

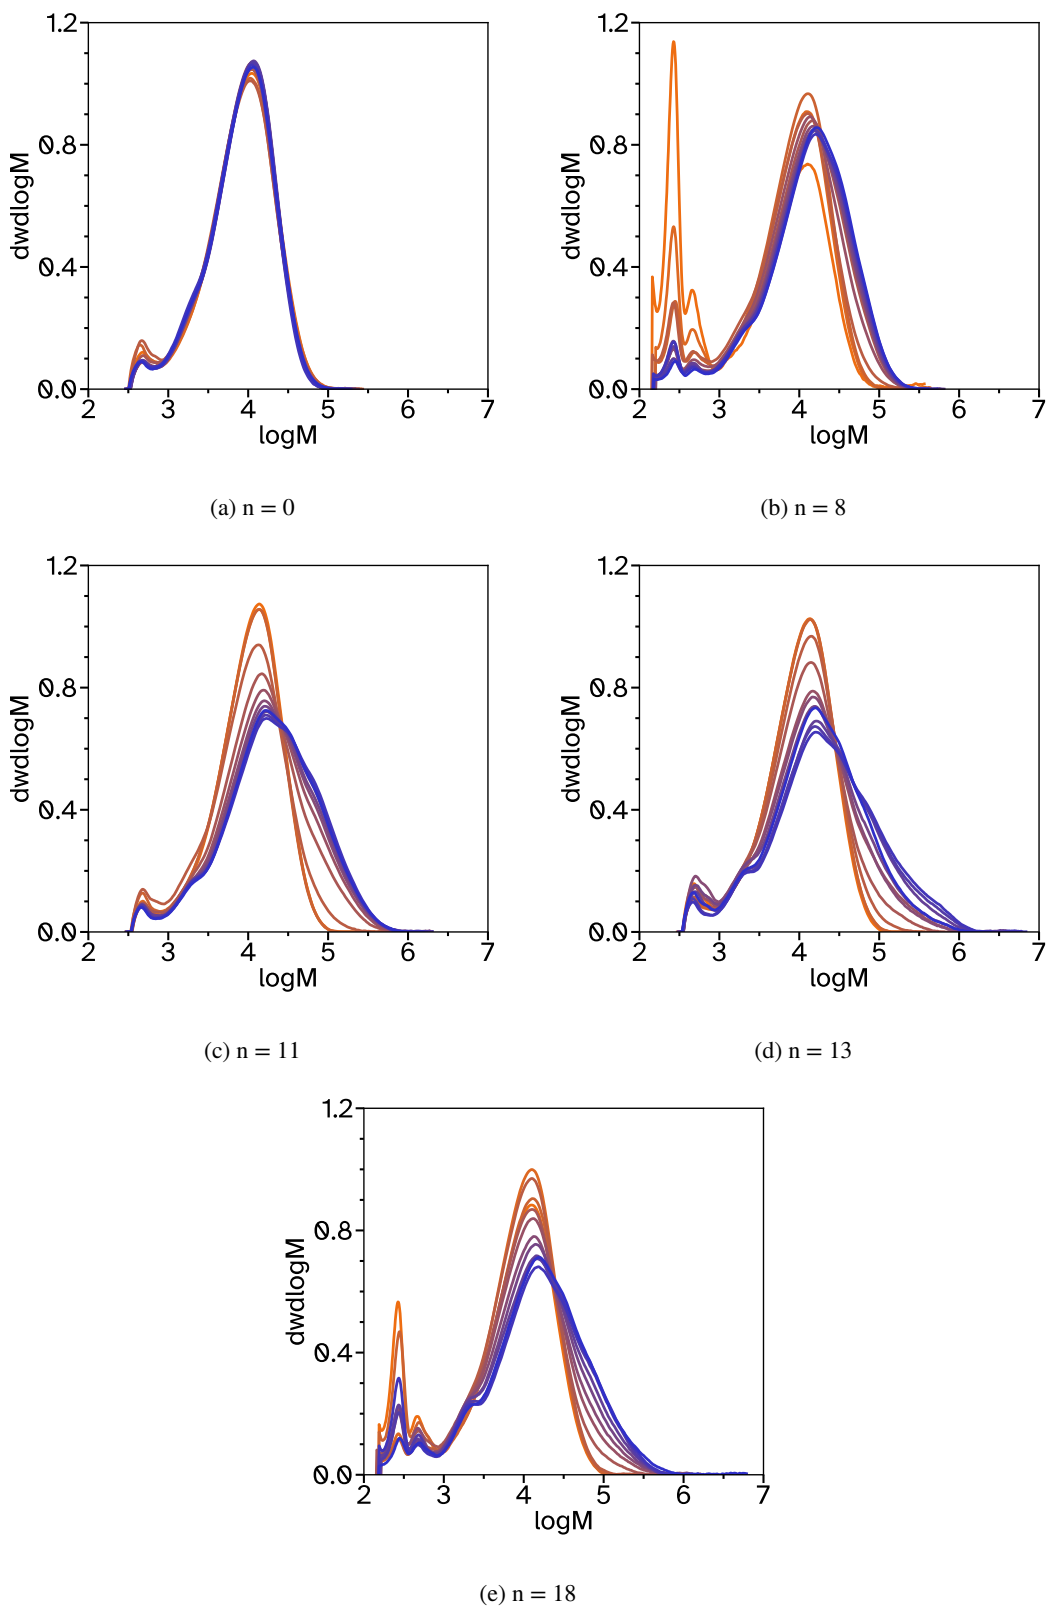

Figure S11: The molecular weight distributions from conventional SEC analysis for F\_Xn\_C2 from 10 min ■ to the final sample at 330 min ■.

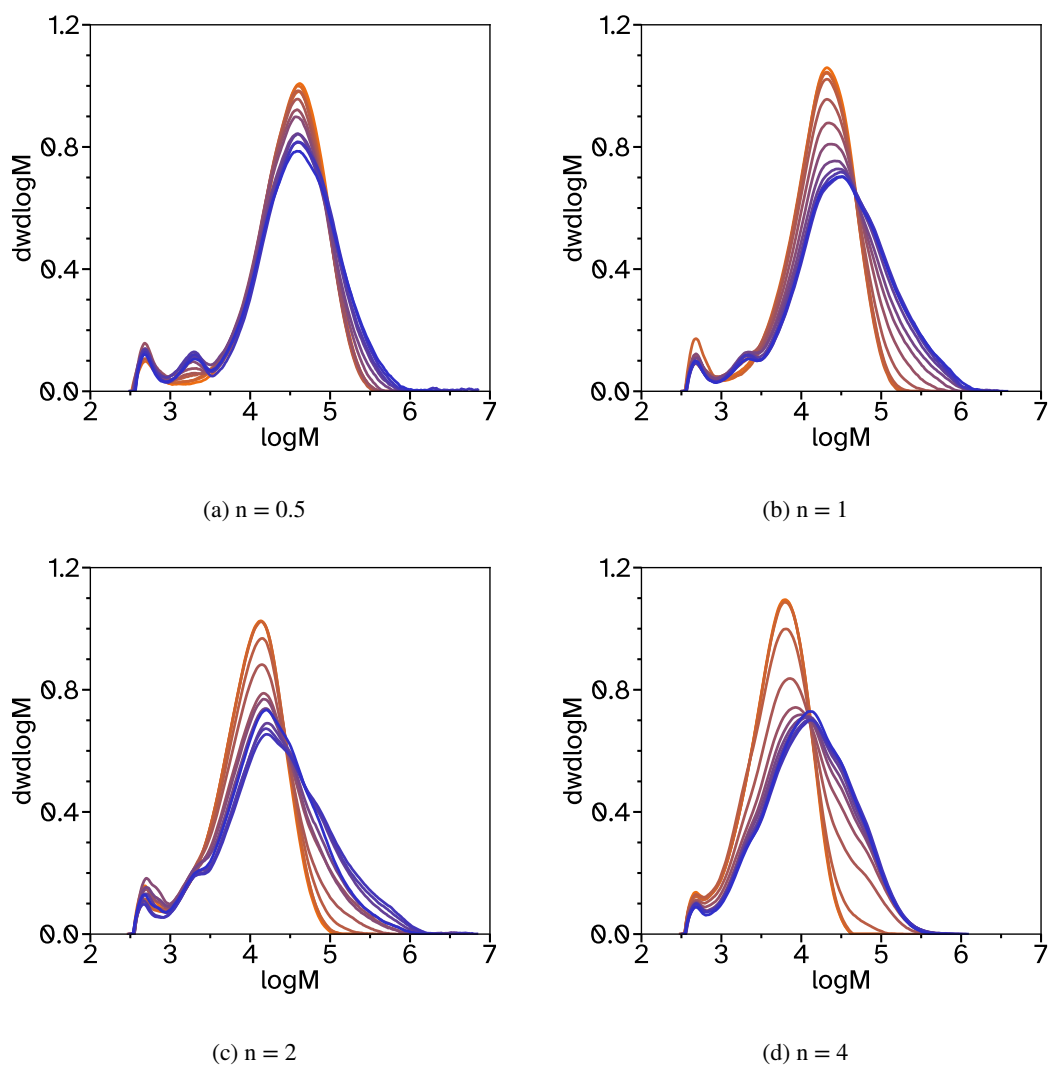

Figure S12: The molecular weight distributions from conventional SEC analysis for F\_X13\_Cn from 10 min ■ to the final sample at 330 min ■.

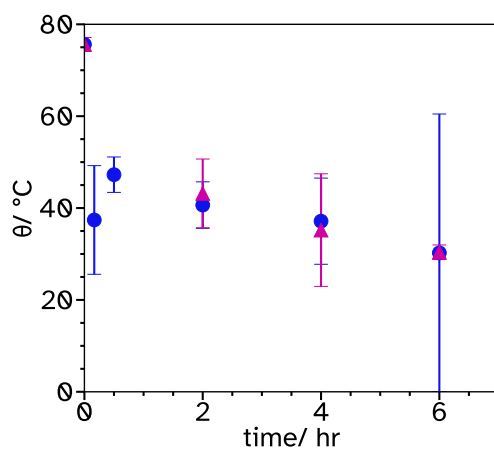

Figure S13: The contact angles of water droplets on the PET substrate after chemical modification for various times at 30 (●) and 60 (▲) °C. The contact angle with no modification is shown at 0 h.

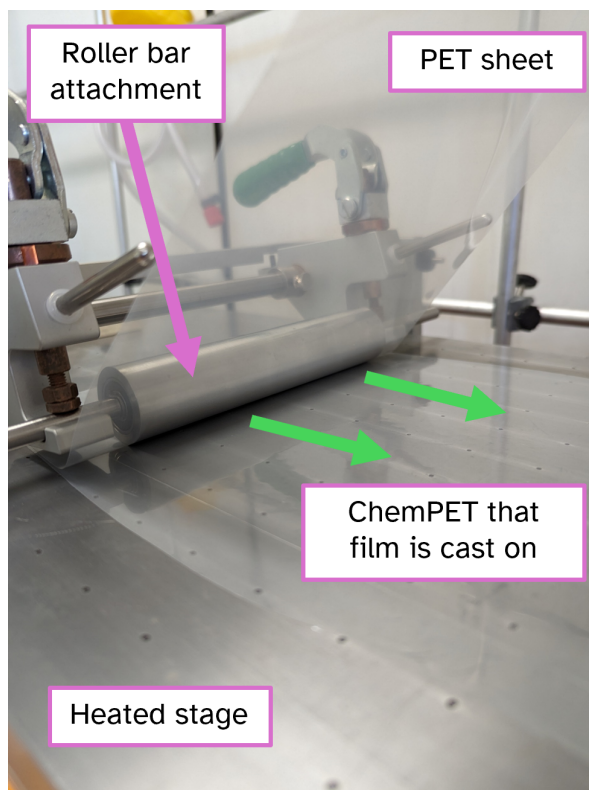

Figure S14: Cylindrical roller bar attachment on an Elcometer 4340 Automatic Film Applicator, which enabled a second sheet of PET to be adhered to the cast films with minimal bubbles. The green arrows show the direction of movement.

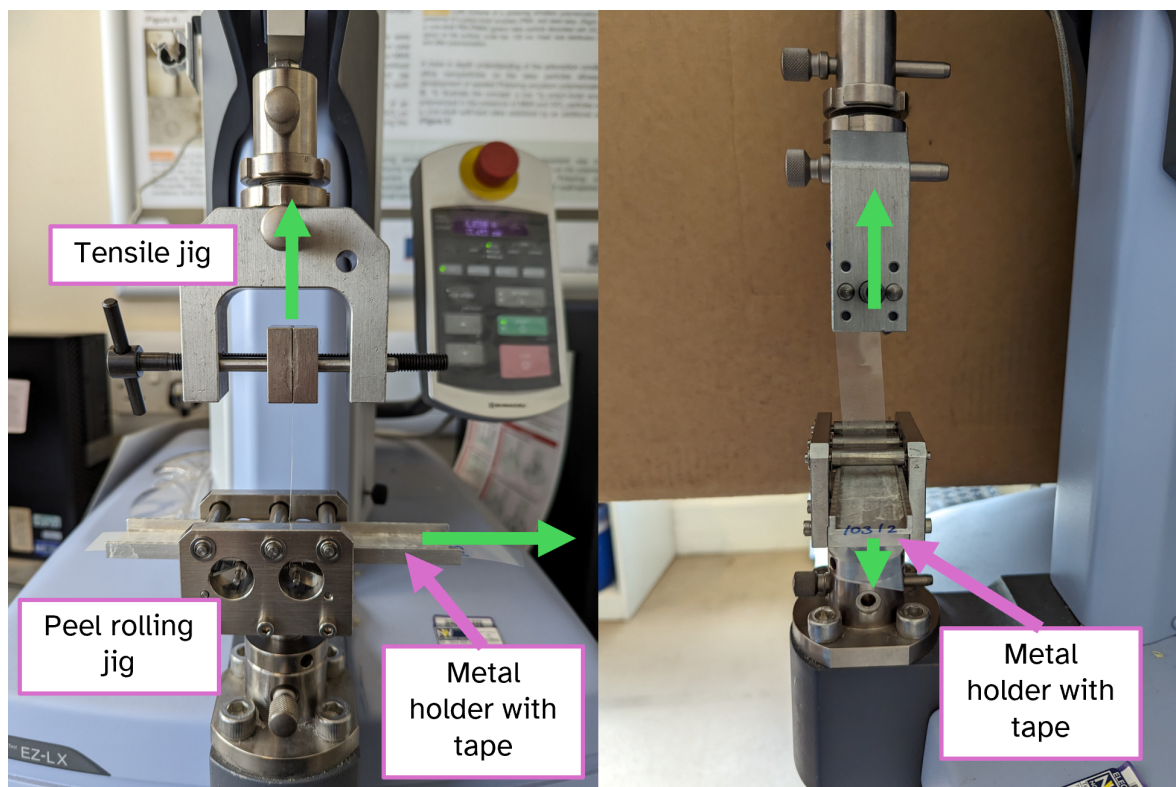

Figure S15: A Shimadzu EZ-LX universal testing machine with a 500 N tensile jig in the upper position and a peel rolling jig in the lower position which can hold a custom-made metal holder used for peel adhesion tests. The green arrows show the direction of movement.



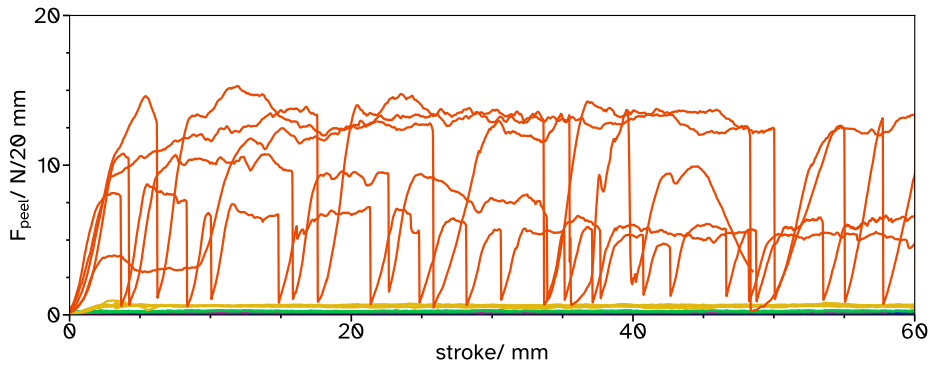

(a) All raw data shown.

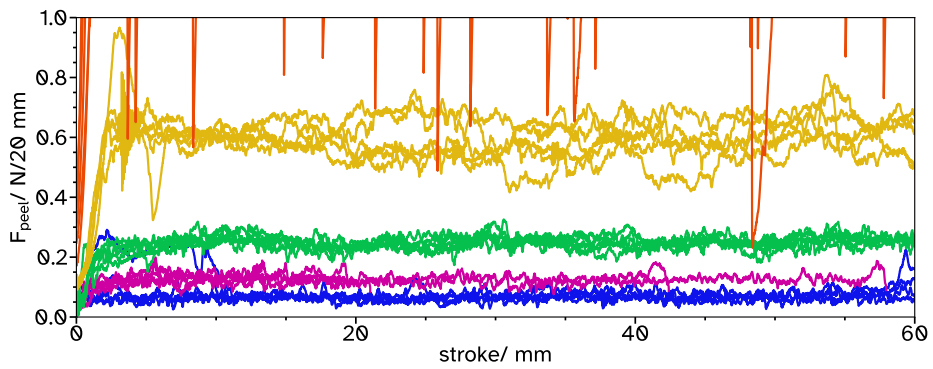

(b) Zoom in on raw data with low  $F_{peel}$ .

Figure S16: Peel adhesion force,  $F_{peel}$  as a function of peel distance, stroke for  $F_{Xn\_C4}$  where  $n = 0$  ■, 8 ■, 11 ■, 13 ■ and 18 ■.

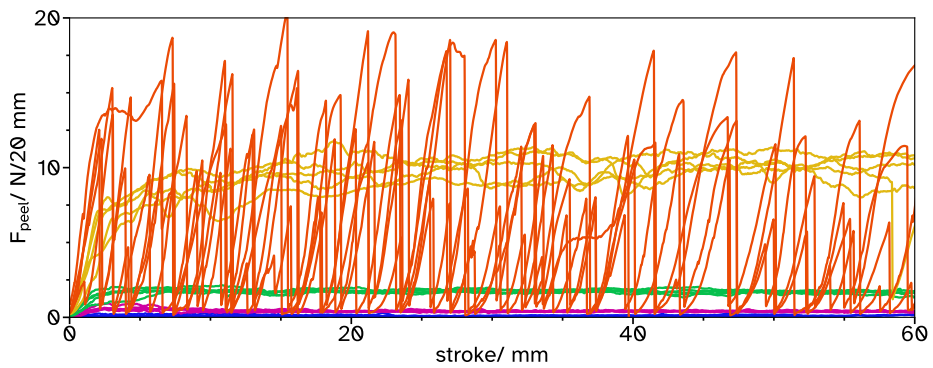

Figure S17: Peel adhesion force,  $F_{peel}$  as a function of peel distance, stroke for  $F_{Xn\_C2}$  where  $n = 0$  ■, 8 ■, 11 ■, 13 ■ and 18 ■.

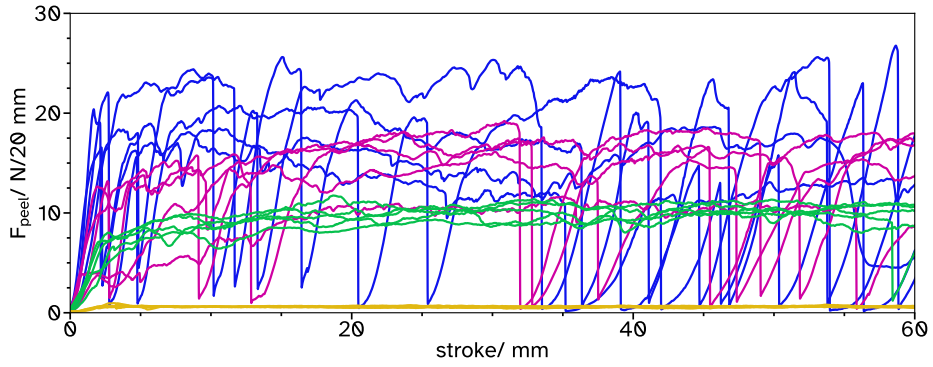

Figure S18: Peel adhesion force,  $F_{peel}$  as a function of peel distance, stroke for F\_X13\_Cn where  $n= 0.5$  ■, 1 ■, 2 ■ and 4 ■.

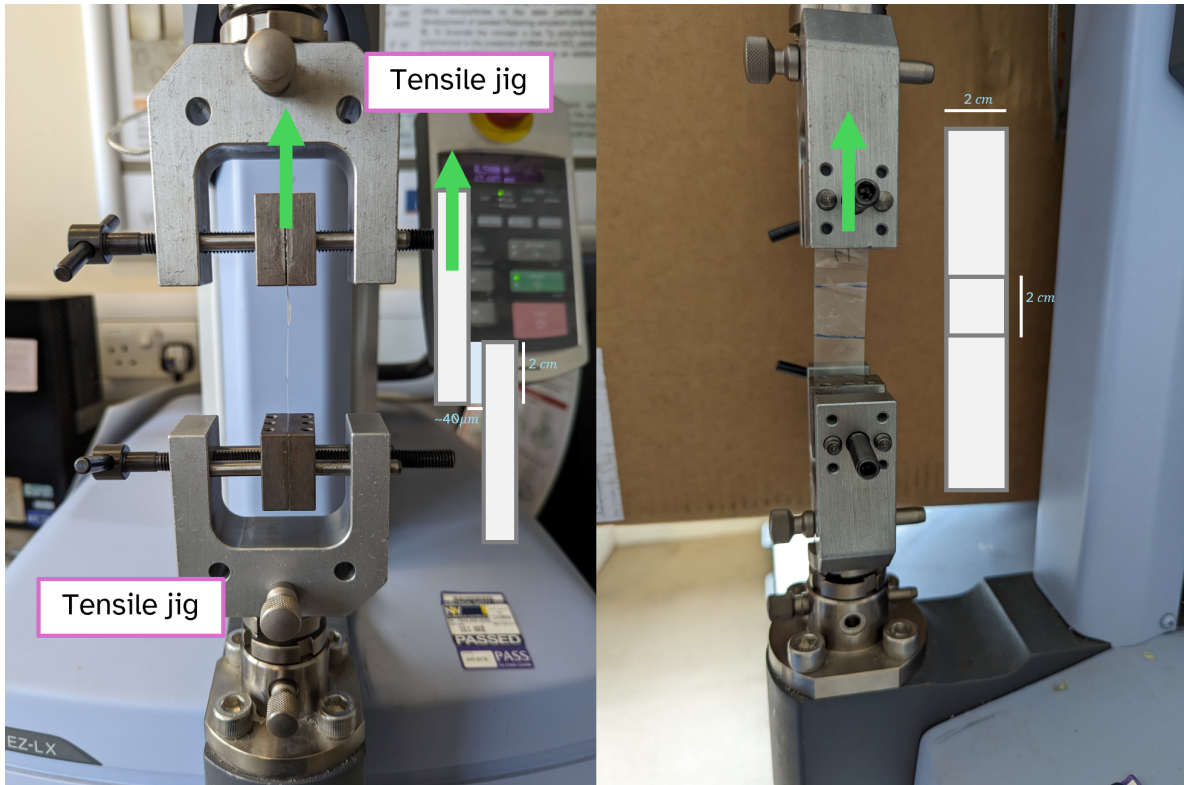

Figure S19: A Shimadzu EZ-LX universal testing machine with 500 N tensile jigs in the upper and lower positions, which held strips of tape connected by a lap joint for shear strength tests. Diagrams are shown within the images to demonstrate the lap joint where the PET is represented the grey outlined shapes and the adhesive is light blue. The green arrows show the direction of movement.

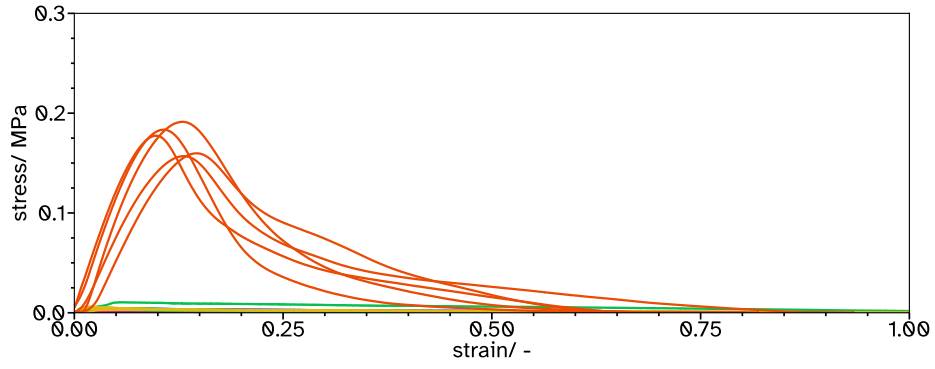

Figure S20: Stress-strain curves to obtain shear strength,  $W_{shear}$ , as the area under the curves for F\_Xn\_C4 where  $n = 0$  ■, 8 ■, 11 ■, 13 ■ and 18 ■.

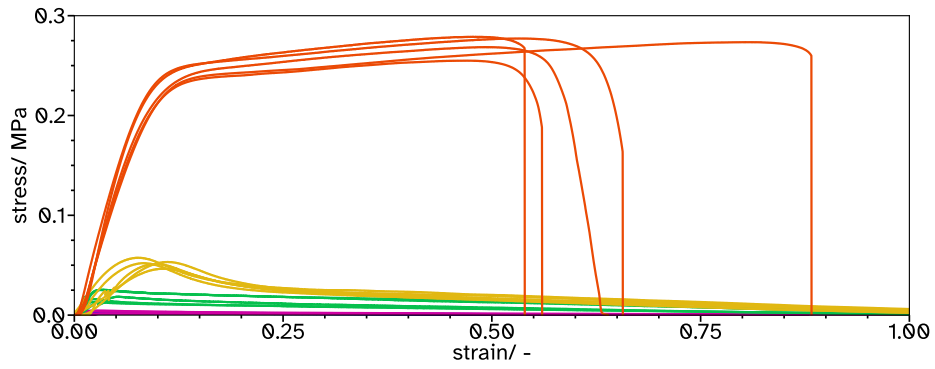

Figure S21: Stress-strain curves to obtain shear strength,  $W_{shear}$ , as the area under the curves for F\_Xn\_C2 where  $n = 0$  ■, 8 ■, 11 ■, 13 ■ and 18 ■.

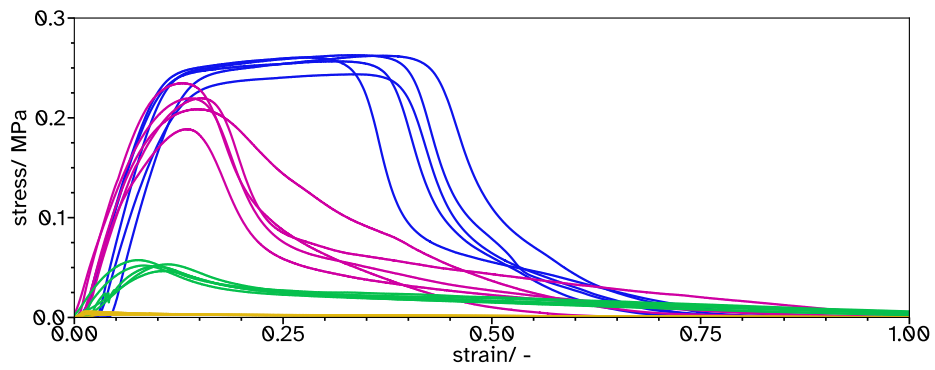

Figure S22: Stress-strain curves to obtain shear strength,  $W_{shear}$ , as the area under the curves for F\_X13\_Cn where  $n = 0.5$  ■, 1 ■, 2 ■ and 4 ■.

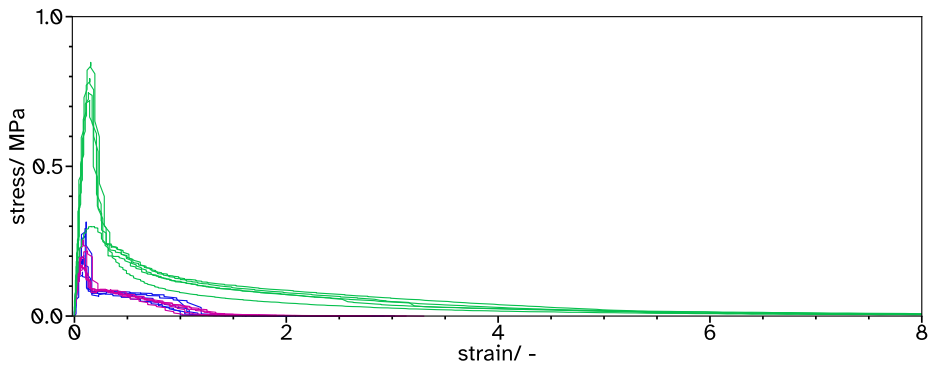

Figure S23: Stress-strain curves to obtain tack adhesion energy,  $W_{adh}$ , as the area under the curves for B\_Xn\_C4 where  $n = 4$ ,  $7$ ,  $16$ .

Table S4: Average film heights during tack testing (average of 5 repeats) and rheological amplitude and frequency sweeps (average during the measurement).

| Latex      | Film height ( $W_{adh}$ )/ $\mu m$ | Film height (amp sweep)/ $\mu m$ | Film height (freq sweep)/ $\mu m$ |
|------------|------------------------------------|----------------------------------|-----------------------------------|
| B_X04_C4   | $301 \pm 29$                       | $203.49 \pm 0.06$                | $138.30 \pm 0.02$                 |
| B_X07_C4   | $414 \pm 27$                       | $213.71 \pm 0.06$                | $220.63 \pm 0.02$                 |
| B_X16_C4   | $716 \pm 163$                      | $646.07 \pm 0.04$                | $675.39 \pm 0.02$                 |
| F_X00_C4   | $153 \pm 28$                       | $79.43 \pm 0.05$                 | $239.55 \pm 0.04$                 |
| F_X08_C4   | $222 \pm 63$                       | $193.46 \pm 0.04$                | $340.48 \pm 0.02$                 |
| F_X11_C4   | $391 \pm 20$                       | $427.46 \pm 0.04$                | $359.48 \pm 0.02$                 |
| F_X13_C4   | $527 \pm 37$                       | $475.79 \pm 0.06$                | $610.29 \pm 0.07$                 |
| F_X18_C4   | $642 \pm 61$                       | $112.74 \pm 0.05$                | $353.71 \pm 0.02$                 |
| F_X00_C2   | $285 \pm 38$                       | $127.95 \pm 0.05$                | $154.86 \pm 0.02$                 |
| F_X08_C2   | $432 \pm 37$                       | $349.79 \pm 0.06$                | $382.94 \pm 0.02$                 |
| F_X11_C2   | $616 \pm 11$                       | $553.74 \pm 0.05$                | $833.77 \pm 0.03$                 |
| F_X13_C2   | $722 \pm 134$                      | $736.07 \pm 0.05$                | $672.03 \pm 0.02$                 |
| F_X18_C2   | $762 \pm 75$                       | $684.79 \pm 0.05$                | $521.38 \pm 0.02$                 |
| F_X13_C1   | $940 \pm 62$                       | $844.93 \pm 0.04$                | $643.97 \pm 0.02$                 |
| F_X13_C0.5 | $976 \pm 22$                       | $829.69 \pm 0.06$                | $792.25 \pm 0.02$                 |

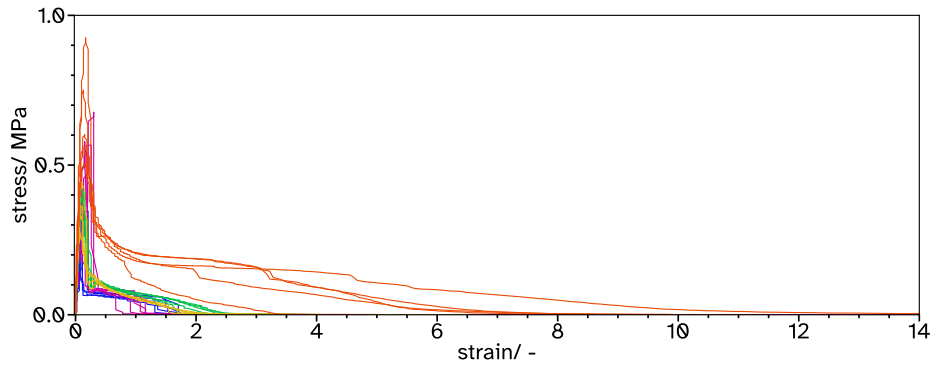

Figure S24: Stress-strain curves to obtain tack adhesion energy,  $W_{adh}$ , as the area under the curves for F\_Xn\_C4 where n = 0 ■, 8 ■, 11 ■, 13 ■ and 18 ■.

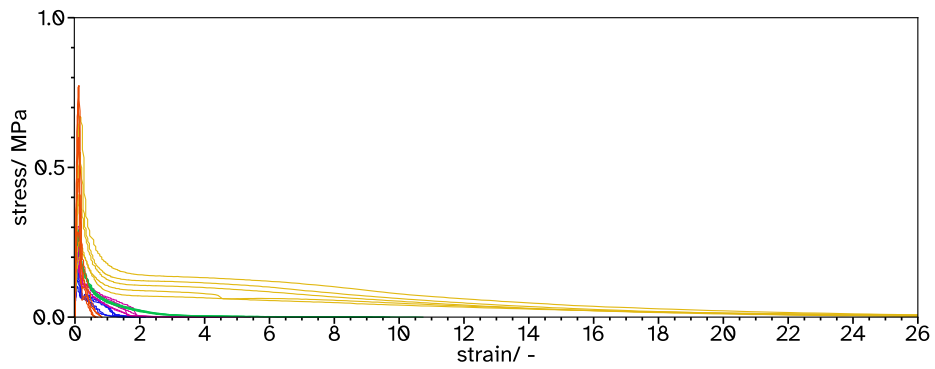

Figure S25: Stress-strain curves to obtain tack adhesion energy,  $W_{adh}$ , as the area under the curves for F\_Xn\_C2 where n = 0 ■, 8 ■, 11 ■, 13 ■ and 18 ■.

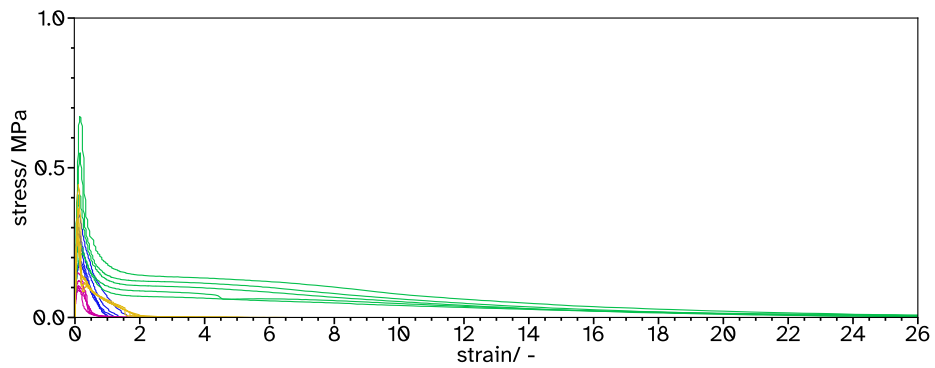

Figure S26: Stress-strain curves to obtain tack adhesion energy,  $W_{adh}$ , as the area under the curves for F\_X13\_Cn where n = 0.5 ■, 1 ■, 2 ■ and 4 ■.

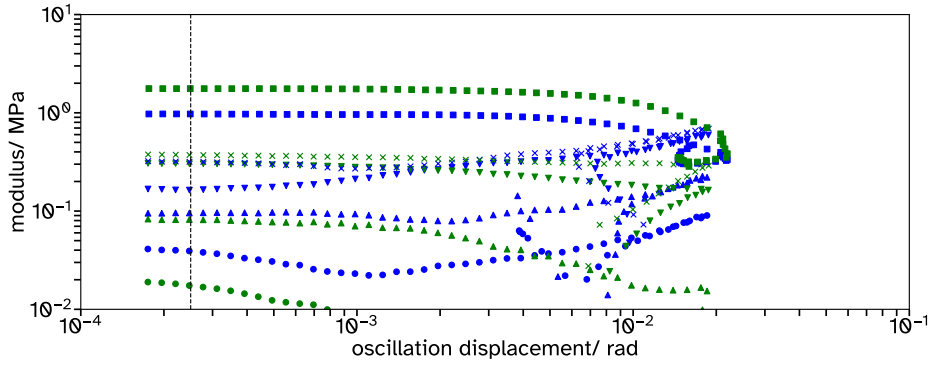

Figure S27: Amplitude sweeps with the storage modulus,  $G'$  ■, and loss modulus,  $G''$  ■, for F\_Xn\_C4 where  $n=0$  ●, 8 ▲, 11 ▼, 13 × and 18 ■. The vertical black line shows the displacement used in the frequency sweeps to remain in the linear viscoelastic regime.

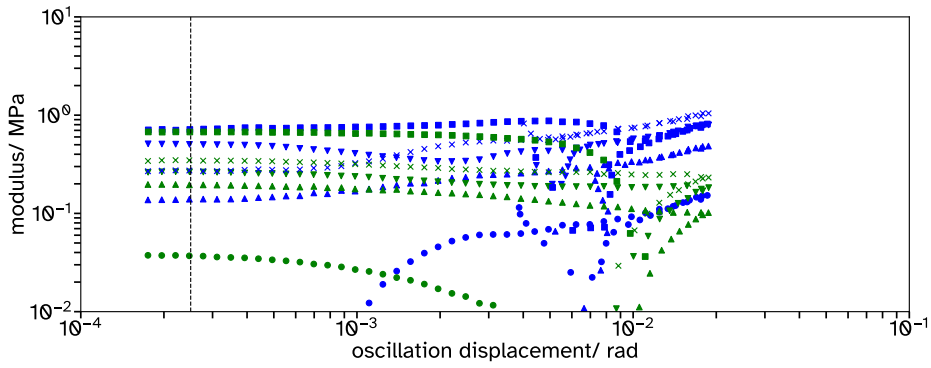

Figure S28: Amplitude sweeps with the storage modulus,  $G'$  ■, and loss modulus,  $G''$  ■, for F\_Xn\_C2 where  $n=0$  ●, 8 ▲, 11 ▼, 13 × and 18 ■. The vertical black line shows the displacement used in the frequency sweeps to remain in the linear viscoelastic regime.

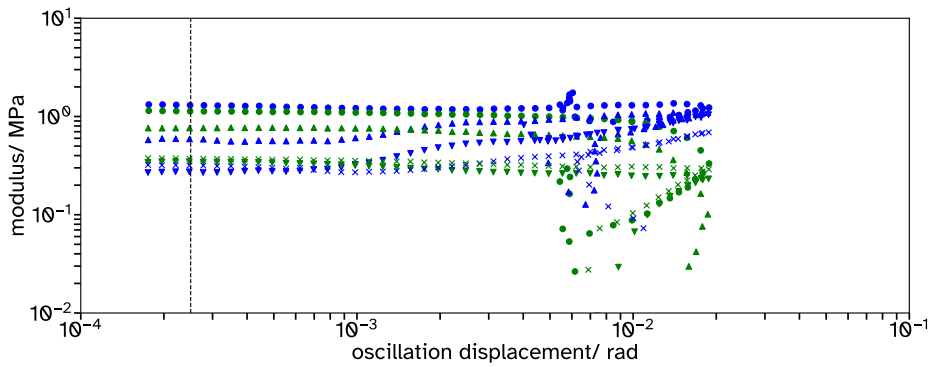

Figure S29: Amplitude sweeps with the storage modulus,  $G'$  ■, and loss modulus,  $G''$  ■, for F\_X13\_Cn where  $n=0.5$  ●, 1 ▲, 2 ▼, and 4 ×. The vertical black line shows the displacement used in the frequency sweeps to remain in the linear viscoelastic regime.

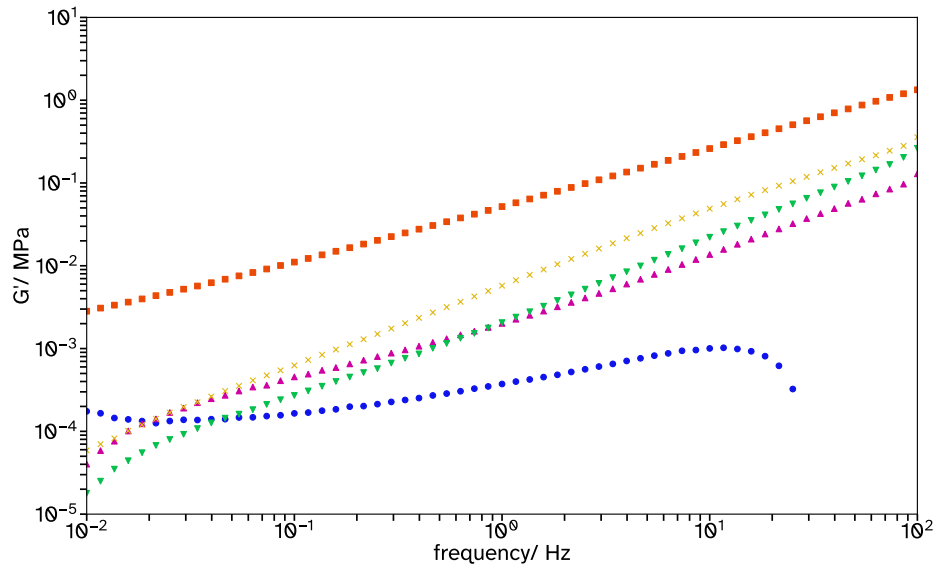

(a)

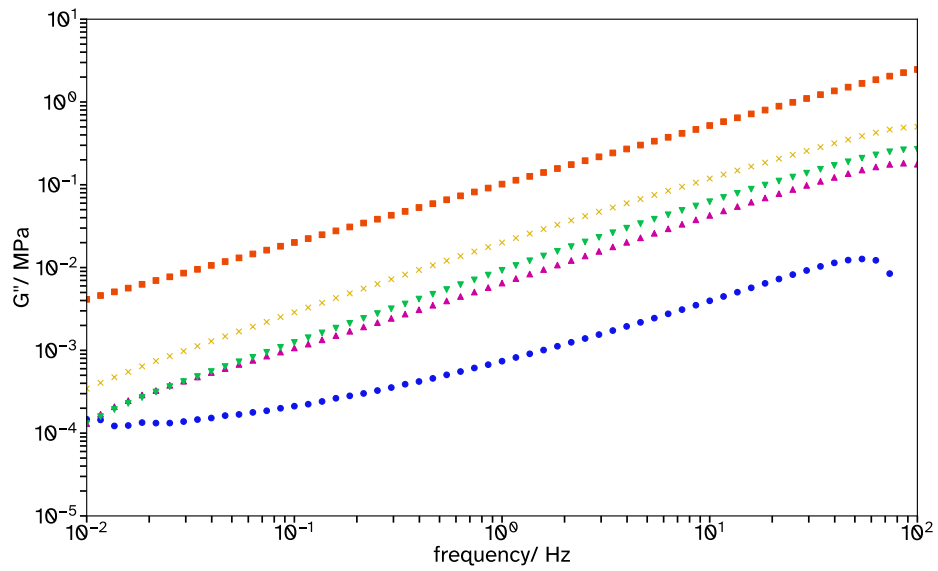

(b)

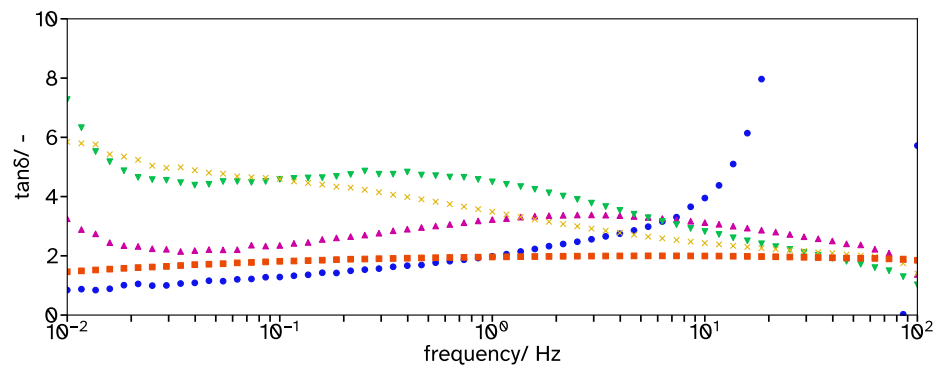

(c)

Figure S30: Rheological frequency sweeps of  $F_{Xn}C4$  where  $n=0$  ●, 8 ▲, 11 ▼, 13 × and 18 ■.

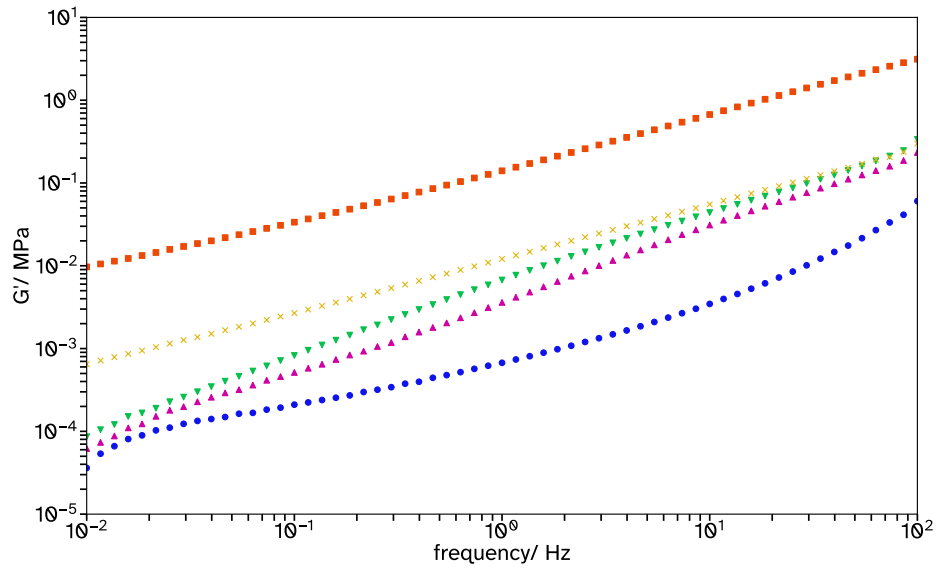

(a)

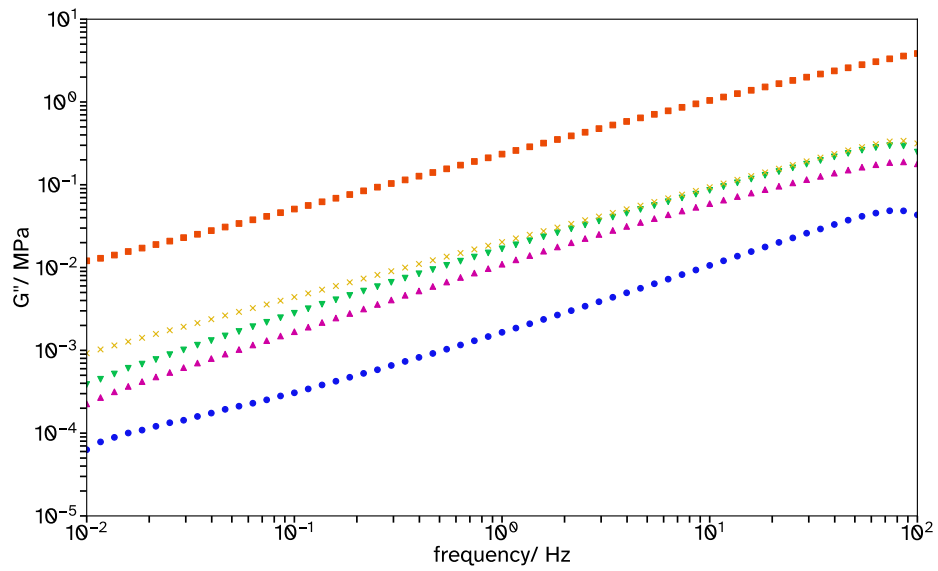

(b)

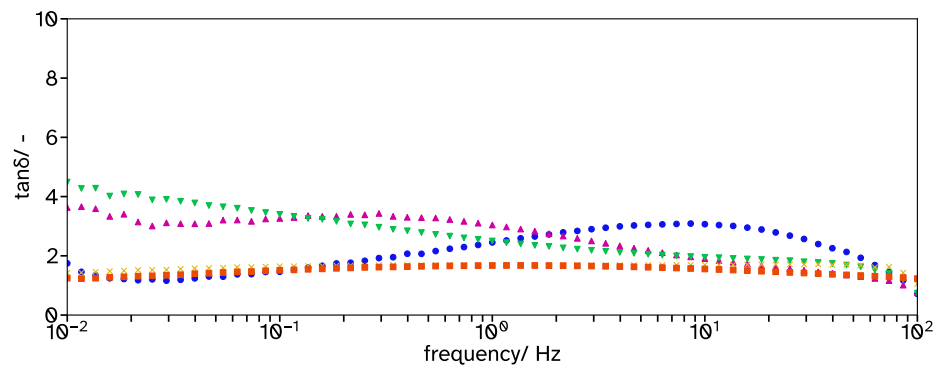

(c)

Figure S31: Rheological frequency sweeps of F\_Xn\_C2 where n= 0 ●, 8 ▲, 11 ▼, 13 × and 18 ■.



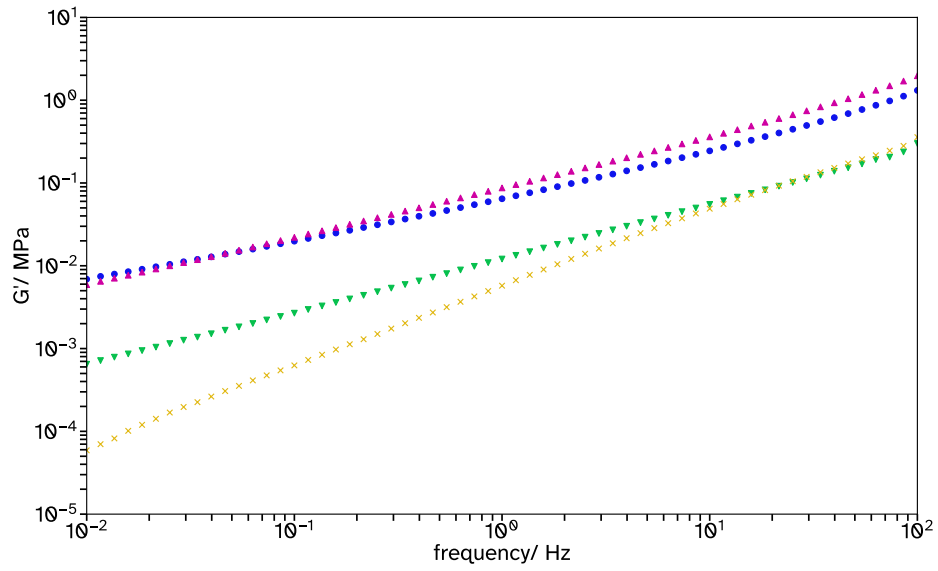

(a)

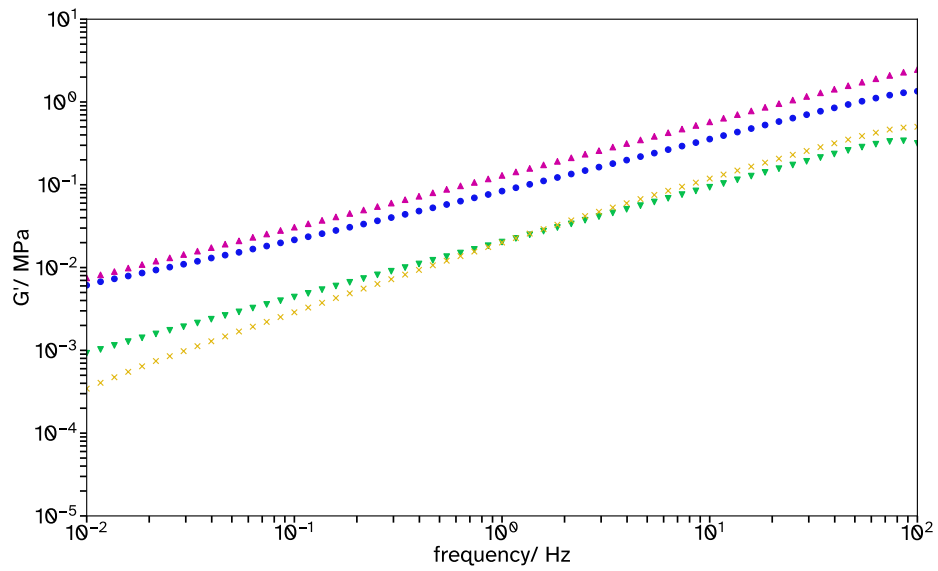

(b)

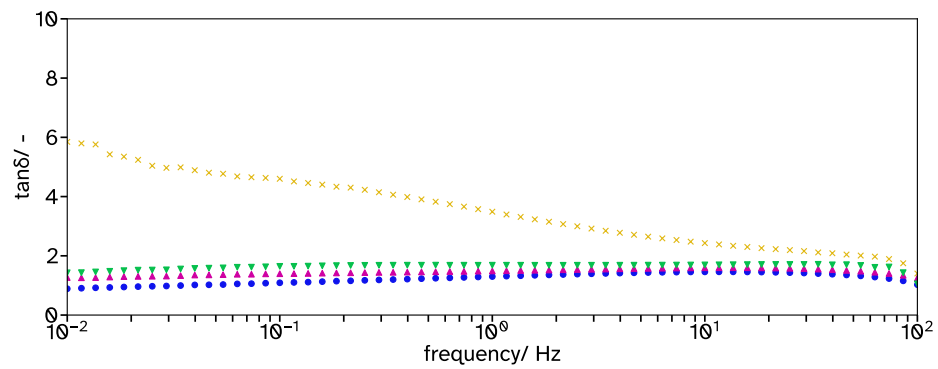

(c)

Figure S32: Rheological frequency sweeps of F\_X13\_Cn where  $n=0.5$  ●, 1 ▲, 2 ▼, and 4 ×.

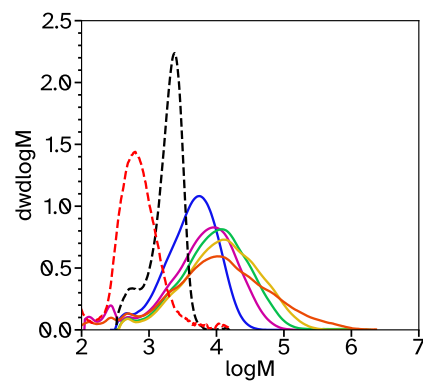

Figure S33: The final molecular weight distributions from conventional SEC analysis for F\_Xn\_C4, where n= 0 ■, 8 ■, 11 ■, 13 ■ and 18 ■ where the surfactant molecular weight distributions for Brij L23 (- - -) and Lakeland PAE 136 (- - -) are also shown.
